# Supplementary material
Source: publisher figshare collection journal article supplement (https://springernature.figshare.com/ndownloader/files/7085294)
Supplement: Supplementary file 1 [file 7085294]

## Sheet: Hoja1
Probe set	Gene symbol	Gene name	p-value
1557278_s_at		CDNA FLJ33199 fis, clone ADRGL2006377	2e-07
229190_at		CDNA FLJ90295 fis, clone NT2RP2000240	3e-07
205306_x_at	KMO	kynurenine 3-hydroxylase	7.4e-06
227541_at	WDRD20	WD repeat domain 20	1.07e-05
235401_s_at	FREB	Fc receptor homolog expressed in B cells	1.19e-05
223226_x_at	SSBP4	single stranded DNA binding protein 4	2.07e-05
210436_at	CCT8	chaperonin containing TCP1, subunit 8 (theta)	2.13e-05
224945_at	BTBD7	BTB (POZ) domain containing 7	6.14e-05
1570043_at			9.61e-05
219805_at	FLJ22965	hypothetical protein FLJ22965	0.0001169
240394_at			0.0002011
232383_at	TFEC	transcription factor EC	0.0002011
221138_s_at			0.0002505
232914_s_at	SYTL2	synaptotagmin-like 2	0.0002614
204634_at	NEK4	NIMA (never in mitosis gene a)-related kinase 4	0.0002713
201302_at	ANXA4	annexin A4	0.0002741
216944_s_at	ITPR1	inositol 1,4,5-triphosphate receptor, type 1	0.0003003
235412_at			0.0003018
203333_at	KIFAP3	kinesin-associated protein 3	0.0003059
215151_at	DOCK10	dedicator of cytokinesis 10	0.0003135
233558_s_at	FLJ12716	protein FLJ12716	0.0003224
217301_x_at	RBBP4	retinoblastoma binding protein 4	0.0003732
208050_s_at	CASP2	caspase 2	0.0003848
36920_at	MTM1	myotubularin 1	0.0004095
225963_at	KIAA1340	KIAA1340 protein	0.0004232
212310_at	FLJ39207	C219-reactive peptide	0.0004529
235177_at	LOC151194	similar to hepatocellular carcinoma-associated antigen HCA557b	0.0004554
227268_at	LOC51136	PTD016 protein	0.0004832
208612_at	GRP58	glucose regulated protein, 58KDa	0.000489
213659_at	ZNF45	zinc finger protein 75	0.0005587
217980_s_at	MRPL16	mitochondrial ribosomal protein L16	0.0005844
205584_at	CXorf45	chromosome X open reading frame 45	0.0005845
220366_at	ELSPBP1	epididymal sperm binding protein 1	0.0006039
201440_at	DDX23	DEAD (Asp-Glu-Ala-Asp) box polypeptide 23	0.0006295
239900_x_at			0.0006427
204703_at	TTC10	tetratricopeptide repeat domain 10	0.0006527
216129_at	ATP9A	ATPase, Class II, type 9A	0.0007041
218536_at	MRS2L	MRS2-like, magnesium homeostasis factor (S.cerevisiae)	0.0007168
208363_s_at	INPP4A	inositol polyphosphate-4-phosphatase, type I, 107kDa	0.0007406
204588_s_at	SLC7A7	solute carrier family 7 (cationic amino acid transporter, y+ system), member 7	0.0008726
201375_s_at	PPP2CB	protein phosphatase 2, catalytic subunit, beta isoform	0.0008942
207681_at	CXCR3	chemokine (C-X-C motif) receptor 3	0.0009282
220024_s_at	PRX	periaxin	0.0009587
1558678_s_at	MALAT1	metastasis associated lung adenocarcinoma transcript 1 (non-coding RNA)	0.0009593
203247_s_at	ZNF24	zinc finger protein 24	0.0009911
